# Supplementary material for: Assessing the determinants of mental health services utilization among adolescents aged 18–24 years in Kicukiro district, Rwanda
Source: Research Square preprint supplement (doi:10.21203/rs.3.rs-8595889/v1), 2026-02-11
Supplement: Supplementary file 1 [file 7501cff93722385e298debd3.docx]

**Questionnaire on Utilization of Mental Health Services Among Adolescents Aged 18–24 in Kicukiro District, Kigali City, Rwanda**

**Introduction:** This questionnaire is designed to gather information about the utilization of mental health services by adolescents in Kicukiro District, Kigali City. The information provided will help to understand factors influencing the use of mental health services and the barriers that might exist. Your responses were kept confidential, and your participation is voluntary.

### **Section 1: Demographic Information**

Please fill out the following questions about your background:

1. **Age:**
   - 18
   - 19
   - 20
   - 21
   - 22
   - 23
   - 24
2. **Gender:**
   - Male
   - Female
   - Other (Please specify): ____________
   - Prefer not to say
3. **What is your highest level of education?**
   - Primary school
   - Secondary school
   - Tertiary education
   - Other (Please specify): ____________
4. **What is your current occupation?**
   - Student
   - Employed
   - Unemployed
   - Other (Please specify): ____________
5. **Do you live in Kicukiro District?**
   - Yes
   - No
6. **How long have you been living in Kicukiro?**
   - Less than 1 year
   - 1-3 years
   - 4-6 years
   - More than 6 years

### **Section 2: Knowledge of Mental Health Services**

This section seeks to understand your knowledge of mental health services available to adolescents.

1. **Are you aware of mental health services available in your community?**
   - Yes
   - No
2. **Which of the following mental health services do you know about? (Select all that apply)**
   - Counseling services
   - Therapy (Individual or group)
   - Psychiatric services
   - Helplines
   - Support groups
   - Other (Please specify): ____________
3. **Where do you think mental health services can be accessed in Kicukiro District?**
   - Health centers
   - Hospitals
   - Private clinics
   - Community centers
   - Religious institutions
   - Online platforms
   - I do not know
4. **Have you ever received any information about mental health services in your community?**
   - Yes
   - No
5. **If yes, how did you receive this information? (Select all that apply)**
   - School
   - Family members
   - Friends
   - Media (e.g., radio, TV)
   - Social media
   - Community outreach programs
   - Other (Please specify): ____________

### **Section 3: Attitudes Towards Mental Health Services**

This section explores your attitude toward seeking and utilizing mental health services.

1. **How do you feel about seeking mental health services if needed?**
   - Very comfortable
   - Comfortable
   - Neutral
   - Uncomfortable
   - Very uncomfortable
2. **Do you believe that using mental health services would affect your reputation among your peers?**
   - Yes, negatively
   - Yes, positively
   - No, it will not affect my reputation
   - I do not know
3. **In your opinion, is there stigma surrounding the use of mental health services in your community?**
   - Yes
   - No
   - I am not sure
4. **Would you feel comfortable discussing mental health issues with your family?**
   - Yes
   - No
   - Sometimes
5. **Do you think mental health services are a necessary resource for adolescents in your community?**
   - Yes
   - No
   - I do not know

### **Section 4: Utilization of Mental Health Services**

This section seeks to explore your actual use of mental health services and the factors influencing that use.

1. **Have you ever sought mental health services?**
   - Yes
   - No
2. **If yes, what kind of mental health service did you use? (Select all that apply)**
   - Counseling
   - Therapy
   - Psychiatric services
   - Support groups
   - Helplines
   - Other (Please specify): ____________
3. **How often do you use mental health services?**
   - Regularly
   - Occasionally
   - Rarely
   - Never
4. **What was the main reason for seeking mental health services? (Select all that apply)**
   - Anxiety
   - Depression
   - Stress
   - Family issues
   - Peer-related issues
   - Self-esteem issues
   - Substance abuse
   - Other (Please specify): ____________
5. **What are the main barriers you face in accessing mental health services? (Select all that apply)**
   - Lack of awareness of available services
   - High cost of services
   - Long waiting times
   - Lack of transportation
   - Fear of stigma
   - Lack of confidentiality
   - Distance from service centers
   - Other (Please specify): ____________
6. **How do you usually find out about available mental health services?**
   - Word of mouth (family, friends)
   - School or educational institutions
   - Healthcare providers
   - Media (radio, TV)
   - Online platforms
   - Other (Please specify): ____________

### **Section 5: Influencing Factors for Willingness to Seek Services**

This section aims to understand what factors influence the decision to seek mental health services.

1. **What factors would make you more likely to seek mental health services? (Select all that apply)**
   - Better knowledge of services available
   - Lower cost of services
   - Increased privacy and confidentiality
   - More youth-friendly services
   - Peer support or encouragement
   - Increased trust in health professionals
   - Availability of online services
   - Other (Please specify): ____________
2. **Would you prefer to access mental health services through:**
   - In-person visits to a healthcare provider
   - Virtual consultations (online)
   - Community-based programs
   - Other (Please specify): ____________

### **Section 6: Final Comments**

1. **Do you have any additional thoughts or comments regarding mental health services that you would like to share?**

### **Thank you for your participation!**
